# Supplementary material
Source: Research Square preprint supplement (doi:10.21203/rs.3.rs-9132094/v1)
Supplement: Supplementary file 1 [file 246f888baede8e5bdf9fea67.docx]

**Supplemental information**

**Materials and methods**

**Sampling and sequencing for guar bean**

Plant materials (cultivar Huijin 1) were grown at Hainan University (20°N, 110°E), Haikou City, Hainan Province, China. Fresh young leaves were taken for DNA extraction. Plant genomic DNA extraction kit (Tiangen Company, Beijing, China) was used to extract DNA from young leaves, and qualified DNA samples were used for library construction. For second-generation library construction, Illumina’s TruSeq DNA HT Sample Preparation Kit (Illumina, Inc, San Diego, USA) is used to prepare the library. After the library is qualified, it is sequenced on the Illumina HiSeq 2000 sequencing platform, obtained 86.67 Gb of second-generation data. For third-generation library construction: Qualified DNA samples were fragmented, and then the BluePippin system (Sage Science Company, USA) was used to screen DNA fragments larger than 20 kb, and then a DNA library was prepared. After the library is qualified, it will be sequenced on the PacBio Sequel platform. Hi-C sequencing: Put the young leaves of guar bean into MS buffer containing 1% formaldehyde solution for fixation. After fixation, put them into MC buffer containing glycine and incubate them. Extract DNA fragments, digest them with DPNII restriction enzyme, label the DNA ends with biotin, add T4 DNA ligase, purify the DNA fragments, and then use streptomycin to enrich the biotin-labeled DNA fragments. After passing the quality inspection, the Hi-C library was sequenced on the Illumina Hiseq sequencer. RNA-seq sequencing: Use the standard Trizol method to extract RNA and complete the extraction of total RNA from each sample. After the library quality is qualified, sequencing is performed on an Illumina sequencer. This project focused on the five tissues of guar bean flowers, leaves, and seeds, and set up three biological replicates for each tissue. A total of 15 samples were subjected to transcriptome sampling and sequencing. Flow cytometry was performed on young leaves, and karyotyping was performed on root tips with active tissue.

**Chromosome number confirming and genome survey**

The actively growing root tips were used for fluorescence in situ hybridization (FISH) to determine the chromosome ploidy of the guar bean at OMIX Technologies Corporation (Chengdu, Sichuan, China), and the result showed that *Cyamopsis tetragonoloba* is a diploid plant containing 2n = 2x = 14 chromosomes. The genome size was first assessed by flow cytometry (BD FACSCalibur) using fresh leaves at OMIX Technologies Corporation (Chengdu, Sichuan, China), which showed that the genome size of guar bean is about 510 Mb (Table S1). The K-mer distribution (K=19) of paired-end Illumina data was counted using Jellyfish (Marçais and Kingsford, 2011) (v1.1.11), the genome size and heterozygosity level were calculated using gce software (Liu et al., 2013) (1.0.2) with default parameters.

**Genome assembly and quality assessment**

NextDenovo (v2.4.0) (parameters: -p out genomeSize = 1.5 g maxThreads = 30 useGrid = false) was used for self-correction, trimming, and preliminary assembly. Pilon (Walker et al., 2014) (v1.22) was then applied three times to polish the preliminarily assembled contigs using Illumina short reads. Finally, the high-quality Hi-C data was used to cluster and orient the the polished contig genome onto pseudo-chromosome genome using the 3D-DNA (Dudchenko et al., 2017) pipeline (180922), and ambiguous fragments were adjusted manually with Juicebox (Durand et al., 2016) (v1.1330). We used three methods to evaluated genome completeness and accuracy: 1) BUSCO (Simão et al., 2015) (Benchmarking Universal Single-Copy Orthologs) analysis (v6.0.0, embryophyta_odb12). The BUSCO analysis result showed that 1906 (94.1%) of the 2026 complete gene elements in the BUSCOs plant set were covered by the guar bean genome (Table S7). 2) Calculation of the LAI (Ou et al., 2018) (Long-terminal repeat Assembly Index) value. The LAI value of guar bean genome was 12.98. 3) Calculation of the mapping rate of Illumina short reads, Hi-C data, and RNA-seq data by mapping them to guar bean genome through BWA (Li and Durbin, 2010) (0.7.17) and Hisat2 (Kim et al., 2015) (2.1.0). The mapping rate of Illumina and Hic data is 99.70% and 99.5%, respectively, and 97.98% of RNA-seq reads from 15 samples were well aligned to the Guar bean genome (Table S6). The above results show that we have obtained a high-quality reference genome of guar bean with high completeness and accuracy.

**Genome annotation**

The repetitive sequences in the *Cyamopsis tetragonoloba* genome were identified using a combined strategy based on homology prediction and de novo searching methods. Firstly, we used RepeatModeler (Flynn et al., 2020) (v2.0.1) and LTR_Finder (Xu and Wang, 2007) (v2.9.0) to bulid a de novo repeat sequences library. Then merge the de novo library and the known Repbase library. Finally, RepeatMasker (Tarailo-Graovac and Chen, 2009) (4.1.2-p1) was used to search for repetitive sequences of guar bean genome. A total of 293,193,686 bp (56.76 %) of repetitive sequences were identified in guar bean genome. Long terminal repeat (LTR) retrotransposons were the main type, which accounted for 23.88% (Table S4). Gypsy and Copia, two main LTR-type transposons, accounted for 14.60% and 7.01% of the genome, respectively. And DNA transposons and unclassified repeats occupied 0.46% and 19.70% of the genome, respectively (Table S4).Ab initio predictions, homology searching and RNA-seq data were used to predict Protein-coding genes of guar bean genome using the MAKER (Cantarel et al., 2008) (v3.01.03) pipeline. Ab initio predictions was performed using Augustus (Stanke et al., 2004) (v3.0.3) and SNAP (Bromberg and Rost, 2007) (v2006-07-28) software. In homology searches, the protein sequences of Arabidopsis thaliana, Oryza sativa, Glycine max, Cicer arietinum, Pisum sativum, Medicago truncatula were provided as protein evidence. Trinity (v2.1.1) (Grabherr et al., 2011) was used to assemble clean RNA-seq reads into inchworm contigs. In total, 47,440 protein-coding genes were predicted in guar bean genome (Table S4).

**Phylogenetic tree, divergence time and gene family expansion and contraction**

Protein sequences from 14 species were used for phylogenetic tree construction, including 11 Faboideae species such as *Trifolium Pratense*, *Medicago Sativa*, *Cicer Arietinum*, *Lotus Japonicus*, *Robinia Pseudoacacia*, *Sesbania Cannabina*, *Phaseolus Vulgaris*, *Vigna Unguiculata*, *Glycine Max*, *Cajanus Cajan*, *Cassia Tora*; two Caesalpinoideae species of *Gleditsia Sinensis* and *Cyamopsis Tetragonoloba*, and the outgroup of *Vitis Vinifera*. OrthoFinder (v2.3.11) (Emms and Kelly, 2015) were used to identify gene families based on an all-versus-all BLASTP (e-value ≤ 1e−5). Based on our analysis, we determined the divergence times between soybean and common bean (CI: 19.5 - 28.8 Mya, Median Time:23.8Mya); and between common bean and cowpea (CI: 8.0 - 19.5 Mya, Median Time:12.6Mya) using data sourced from the TimeTree (Kumar et al., 2022) website (http://www.timetree.org/). These values served as benchmarks for our study. Subsequently, we employed the MCMCtree (Yang, 2007) (4.10.0) to ascertain the divergence times for all species under investigation. Additionally, we extracted results from Orthofinder (Emms and Kelly, 2015) (v2.3.11) and utilized the CAFÉ (v4.2.1) (Mendes et al., 2021) with parameters set to -p -k 5 -o k5p to analyze gene family contractions and expansions across each species. Based on these findings, we constructed the phylogenetic tree using the Chiplot (Li et al., 2023) website (https://www.chiplot.online/), making manual adjustments to relevant parameters to effectively visualize divergence times and the dynamics of gene family contractions and expansions.

**Whole-genome duplication and *Ks* analysis**

To align the protein sequences of the specified genomes, the Blast (Altschul et al., 1990) (v2.16.0) was employed with the following parameters: blastp -number_threads 10 -outfmt 6 -evalue 1e-5 -num_alignments 20. Following the alignment, the WGDI (Sun et al., 2022) software was utilized to fit whole-genome duplication events based on the *Ks* distribution, applying the default parameters. Subsequently, the area range was manually selected in accordance with the prior results. Finally, the command wgdi -kf (area:0,2.5) was executed to plot the *Ks* fitting plot. Given the significant disparities in evolutionary rates across different genes and species, the original *Ks* values were adjusted based on previous studies(Wang et al., 2019). After manual corrections, the wgdi -kf command was employed once more to generate the *Ks* fitting plot.

**Genome Collinearity Analysis**

We employed the Blast software with the parameters “-outfmt 6 and -evalue 1e-5” to identify significant gene pairs across genomes and to ascertain the chromosomal segments where these key genes are located. Initially, we utilized the format conversion tool (jcvi.formats.gff) included in the JCVI (v1.4.16) (Tang et al., 2024) with the command “python3 -m jcvi.formats.gff bed --type=gene --key=ID” to extract a BED file containing solely the gene position information from the genome annotation file. Subsequently, based on the chromosome information of the key genes, we extracted the BED position information pertinent to that chromosome from the BED file and merged the BED position information of the key gene chromosomes from multiple species using the command “python3 -m jcvi.formats.bed merge”. Using the JCVI software with the parameters “python3 -m jcvi.compara.catalog ortholog --cscore=.99 --no_strip_names”, we obtained chromosome collinearity results. Based on these results, we derived unique alignment outcomes of key genes between various species and guar by employing the parameters “python3 -m jcvi.compara.synteny mcscan --iter=1 -o”. Additionally, we utilized the parameter “python3 -m jcvi.formats.base join --noheader” to merge block files from multiple species, followed by a manual extraction and correction of the relevant results. Finally, we employed the parameter “python3 -m jcvi.graphics.synteny” to visualize genome synteny and manually adjusted the plots to illustrate microsyntenic regions.

**Transcriptome Analysis**

We utilized the fastq-dump (Katz et al., 2022) (v3.0.10) to process the downloaded transcriptome data of Fabaceous plants, employing the parameters “fastq-dump --gzip --split-3” to effectively split the data. Following this, we applied fastp (v0.24.1) (Chen et al., 2018) with the parameters: `fastp -i -I -o -O` to filter the split data. Subsequently, we employed Hisat2 (Kim et al., 2015) (v2.1.0) using the parameters “hisat2 --new-summary -p 2 -x -1 -2 -S --rna-strandness R” to align the filtered data to the genome. Next, we utilized SAMtools (Li et al., 2009) (v1.21) with the parameters “samtools view -@ 8 -S -1b -o” to convert the format of the data post-genome alignment. Finally, we executed an R script to determine the expression levels of various genes across different tissues of diverse leguminous plants. Based on the Blast alignment results, we extracted the expression levels of genes involved in the galactomannan biosynthesis pathway across Fabaceous species and manually normalized the data. Subsequently, we employed TBtools (v2.310) (Chen et al., 2020) for visualization to generate expression heatmaps.

**Reference**

Altschul, S.F., Gish, W., Miller, W., Myers, E.W. and Lipman, D.J. (1990) Basic local alignment search tool. *Journal of Molecular Biology* **215**, 403-410.

Bromberg, Y. and Rost, B. (2007) SNAP: predict effect of non-synonymous polymorphisms on function. *Nucleic Acids Research* **35**, 3823-3835.

Cantarel, B.L., Korf, I., Robb, S.M., Parra, G., Ross, E., Moore, B., Holt, C., Sánchez Alvarado, A. and Yandell, M. (2008) MAKER: an easy-to-use annotation pipeline designed for emerging model organism genomes. *Genome Research* **18**, 188-196.

Chen, C., Chen, H., Zhang, Y., Thomas, H.R., Frank, M.H., He, Y. and Xia, R. (2020) TBtools: an integrative toolkit developed for interactive analyses of big biological data. *Molecular Plant* **13**, 1194-1202.

Chen, S., Zhou, Y., Chen, Y. and Gu, J. (2018) fastp: an ultra-fast all-in-one FASTQ preprocessor. *Bioinformatics* **34**, i884-i890.

Dudchenko, O., Batra, S.S., Omer, A.D., Nyquist, S.K., Hoeger, M., Durand, N.C., Shamim, M.S., Machol, I., Lander, E.S., Aiden, A.P. and Aiden, E.L. (2017) De novo assembly of the *Aedes aegypti* genome using Hi-C yields chromosome-length scaffolds. *Science* **356**, 92-95.

Durand, N.C., Robinson, J.T., Shamim, M.S., Machol, I., Mesirov, J.P., Lander, E.S. and Aiden, E.L. (2016) Juicebox provides a visualization system for Hi-C contact maps with unlimited zoom. *Cell Systems* **3**, 99-101.

Emms, D.M. and Kelly, S. (2015) OrthoFinder: solving fundamental biases in whole genome comparisons dramatically improves orthogroup inference accuracy. *Genome Biology* **16**, 157.

Flynn, J.M., Hubley, R., Goubert, C., Rosen, J., Clark, A.G., Feschotte, C. and Smit, A.F. (2020) RepeatModeler2 for automated genomic discovery of transposable element families. *Proceedings of the National Academy of Sciences of the United States of America* **117**, 9451-9457.

Grabherr, M.G., Haas, B.J., Yassour, M., Levin, J.Z., Thompson, D.A., Amit, I., Adiconis, X., Fan, L., Raychowdhury, R., Zeng, Q., Chen, Z., Mauceli, E., Hacohen, N., Gnirke, A., Rhind, N., di Palma, F., Birren, B.W., Nusbaum, C., Lindblad-Toh, K., Friedman, N. and Regev, A. (2011) Full-length transcriptome assembly from RNA-Seq data without a reference genome. *Nature Biotechnology* **29**, 644-652.

Hu, H., Wang, H., Zhang, Y., Kan, B., Ding, Y. and Huang, J. (2019) Characterization of genes in guar gum biosynthesis based on quantitative RNA-sequencing in guar bean (Cyamopsis tetragonoloba). *Scientific Reports* **9**, 10991.

Jumper, J., Evans, R., Pritzel, A., Green, T., Figurnov, M., Ronneberger, O., Tunyasuvunakool, K., Bates, R., Žídek, A., Potapenko, A., Bridgland, A., Meyer, C., Kohl, S.A.A., Ballard, A.J., Cowie, A., Romera-Paredes, B., Nikolov, S., Jain, R., Adler, J., Back, T., Petersen, S., Reiman, D., Clancy, E., Zielinski, M., Steinegger, M., Pacholska, M., Berghammer, T., Bodenstein, S., Silver, D., Vinyals, O., Senior, A.W., Kavukcuoglu, K., Kohli, P. and Hassabis, D. (2021) Highly accurate protein structure prediction with AlphaFold. *Nature* **596**, 583-589.

Katz, K., Shutov, O., Lapoint, R., Kimelman, M., Brister, J.R. and O'Sullivan, C. (2022) The Sequence Read Archive: a decade more of explosive growth. *Nucleic Acids Research* **50**, D387-d390.

Kim, D., Langmead, B. and Salzberg, S.L. (2015) HISAT: a fast spliced aligner with low memory requirements. *Nature Methods* **12**, 357-360.

Kim, S., Chen, J., Cheng, T., Gindulyte, A., He, J., He, S., Li, Q., Shoemaker, B.A., Thiessen, P.A., Yu, B., Zaslavsky, L., Zhang, J. and Bolton, E.E. (2021) PubChem in 2021: new data content and improved web interfaces. *Nucleic Acids Research* **49**, D1388-d1395.

Kumar, S., Stecher, G., Li, M., Knyaz, C. and Tamura, K. (2018) MEGA X: molecular evolutionary genetics analysis across computing platforms. *Molecular Biology and Evolution* **35**, 1547-1549.

Kumar, S., Suleski, M., Craig, J.M., Kasprowicz, A.E., Sanderford, M., Li, M., Stecher, G. and Hedges, S.B. (2022) TimeTree 5: an expanded resource for species divergence times. *Molecular Biology and Evolution* **39**, msac174.

Li, H. and Durbin, R. (2010) Fast and accurate long-read alignment with Burrows-Wheeler transform. *Bioinformatics* **26**, 589-595.

Li, H., Handsaker, B., Wysoker, A., Fennell, T., Ruan, J., Homer, N., Marth, G., Abecasis, G. and Durbin, R. (2009) The Sequence Alignment/Map format and SAMtools. *Bioinformatics* **25**, 2078-2079.

Li, X., Li, J., Zhao, Q., Qiao, L., Wang, L. and Yu, C. (2023) Physiological, biochemical, and genomic elucidation of the Ensifer adhaerens M8 strain with simultaneous arsenic oxidation and chromium reduction. *Journal of Hazardous Materials* **441**, 129862.

Liu, B., Shi, Y., Yuan, J., Hu, X., Zhang, H., Li, N., Li, Z., Chen, Y., Mu, D. and Fan, W. (2013) Estimation of genomic characteristics by analyzing k-mer frequency in de novo genome projects. *arXiv preprint arXiv:1308.2012*.

Marçais, G. and Kingsford, C. (2011) A fast, lock-free approach for efficient parallel counting of occurrences of k-mers. *Bioinformatics* **27**, 764-770.

Mendes, F.K., Vanderpool, D., Fulton, B. and Hahn, M.W. (2021) CAFE 5 models variation in evolutionary rates among gene families. *Bioinformatics* **36**, 5516-5518.

Mirdita, M., Schütze, K., Moriwaki, Y., Heo, L., Ovchinnikov, S. and Steinegger, M. (2022) ColabFold: making protein folding accessible to all. *Nature Methods* **19**, 679-682.

Morris, G.M., Huey, R., Lindstrom, W., Sanner, M.F., Belew, R.K., Goodsell, D.S. and Olson, A.J. (2009) AutoDock4 and AutoDockTools4: Automated docking with selective receptor flexibility. *Journal of Computational Chemistry* **30**, 2785-2791.

O'Boyle, N.M., Banck, M., James, C.A., Morley, C., Vandermeersch, T. and Hutchison, G.R. (2011) Open Babel: An open chemical toolbox. *Journal of Cheminformatics* **3**, 33.

Ou, S., Chen, J. and Jiang, N. (2018) Assessing genome assembly quality using the LTR Assembly Index (LAI). *Nucleic Acids Research* **46**, e126.

Simão, F.A., Waterhouse, R.M., Ioannidis, P., Kriventseva, E.V. and Zdobnov, E.M. (2015) BUSCO: assessing genome assembly and annotation completeness with single-copy orthologs. *Bioinformatics* **31**, 3210-3212.

Stanke, M., Steinkamp, R., Waack, S. and Morgenstern, B. (2004) AUGUSTUS: a web server for gene finding in eukaryotes. *Nucleic Acids Research* **32**, W309-312.

Sun, P., Jiao, B., Yang, Y., Shan, L., Li, T., Li, X., Xi, Z., Wang, X. and Liu, J. (2022) WGDI: A user-friendly toolkit for evolutionary analyses of whole-genome duplications and ancestral karyotypes. *Molecular Plant* **15**, 1841-1851.

Tang, H., Krishnakumar, V., Zeng, X., Xu, Z., Taranto, A., Lomas, J.S., Zhang, Y., Huang, Y., Wang, Y., Yim, W.C., Zhang, J. and Zhang, X. (2024) JCVI: A versatile toolkit for comparative genomics analysis. *Imeta* **3**, e211.

Tarailo-Graovac, M. and Chen, N. (2009) Using RepeatMasker to identify repetitive elements in genomic sequences. *Current Protocols in Bioinformatics* **Chapter 4**, 4.10.11-14.10.14.

Walker, B.J., Abeel, T., Shea, T., Priest, M., Abouelliel, A., Sakthikumar, S., Cuomo, C.A., Zeng, Q., Wortman, J., Young, S.K. and Earl, A.M. (2014) Pilon: an integrated tool for comprehensive microbial variant detection and genome assembly improvement. *PLoS One* **9**, e112963.

Wang, J., Yuan, J., Yu, J., Meng, F., Sun, P., Li, Y., Yang, N., Wang, Z., Pan, Y., Ge, W., Wang, L., Li, J., Liu, C., Zhao, Y., Luo, S., Ge, D., Cui, X., Feng, G., Wang, Z., Ji, L., Qin, J., Li, X., Wang, X. and Xi, Z. (2019) Recursive paleohexaploidization shaped the durian genome. *Plant Physiology* **179**, 209-219.

Xu, Z. and Wang, H. (2007) LTR_FINDER: an efficient tool for the prediction of full-length LTR retrotransposons. *Nucleic Acids Research* **35**, W265-268.

Yang, Z. (2007) PAML 4: phylogenetic analysis by maximum likelihood. *Molecular Biology and Evolution* **24**, 1586-1591.
