# Supplementary material
Source: Research Square preprint supplement (doi:10.21203/rs.3.rs-9132094/v1)
Supplement: Supplementary file 1 [file 9868e69aaf054032acaee7ef.docx]

**Supplemental Figures**


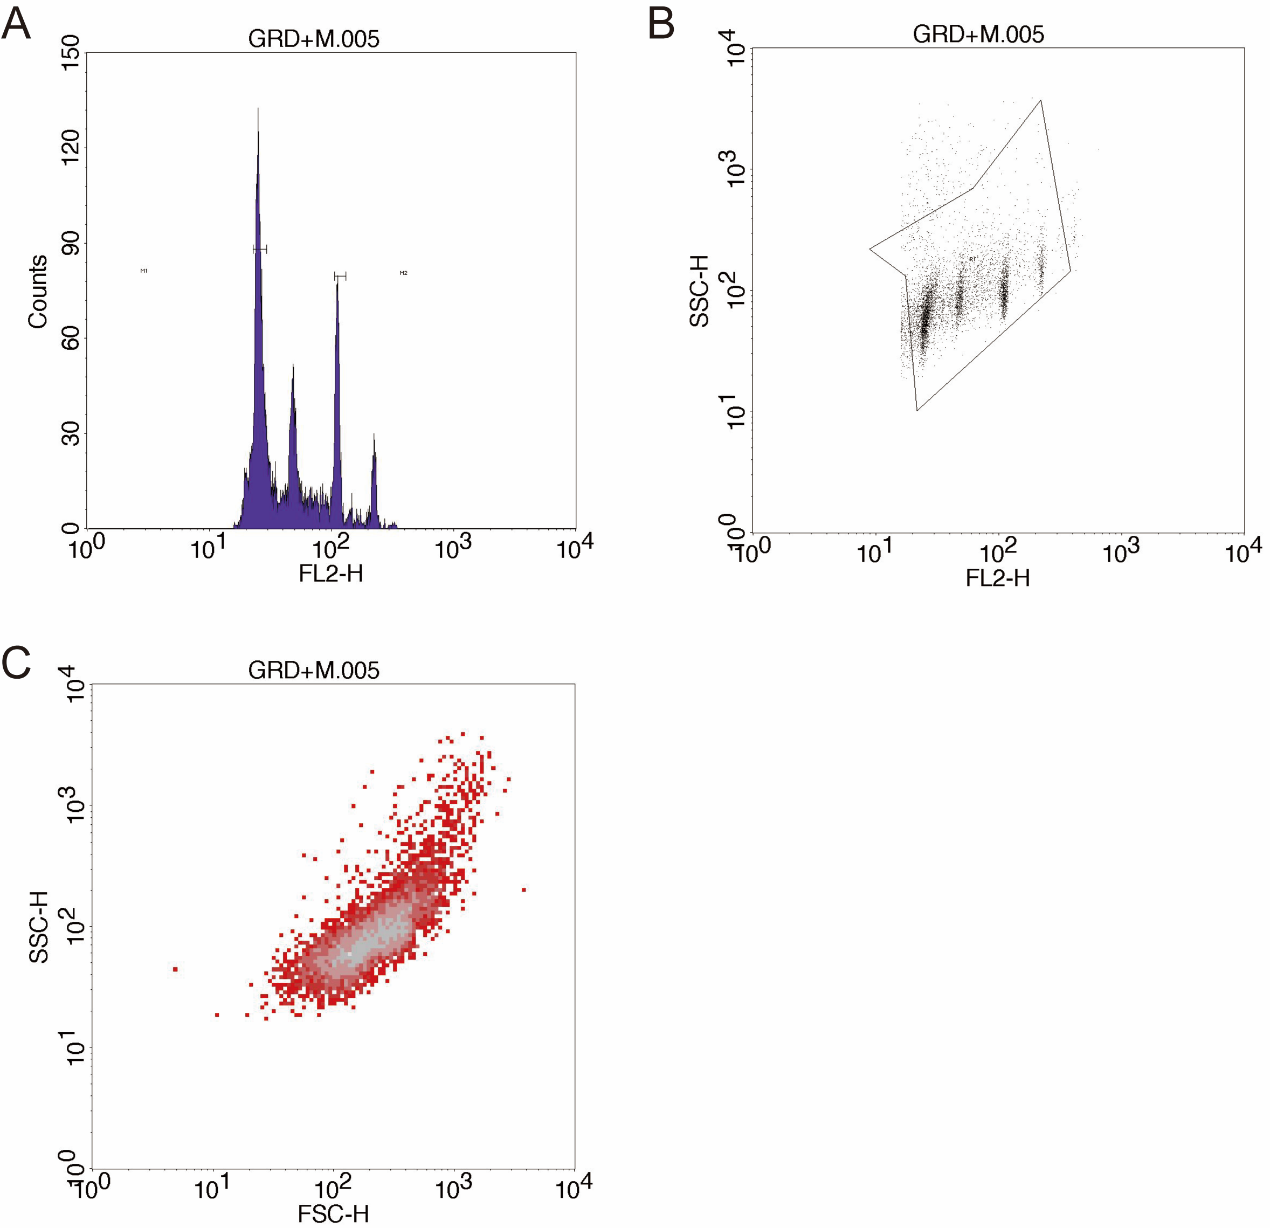


**Supplemental Figure 1. Flow cytometry analyses of *C. tetragonoloba*.** *Zea mays* and *Solanum lycopersicum* was used as an internal reference.


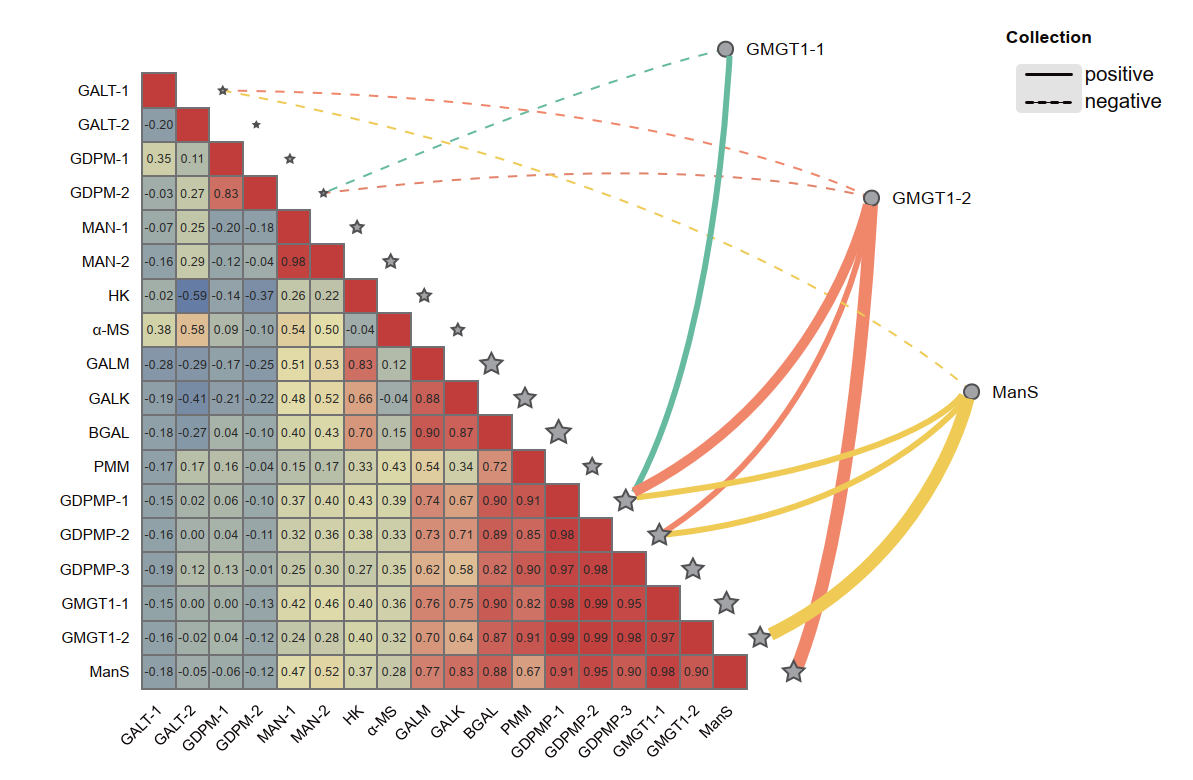


**Supplemental Figure 2. Correlation of *ManS* and *GMGT1* with genes involved in galactomanan biosynthesis.** Each node in the network represents a different gene, and the thickness of the lines indicates the strength of the correlation, with thicker lines representing stronger correlations. Solid lines indicate positive correlation, while dashed lines indicate negative correlation.


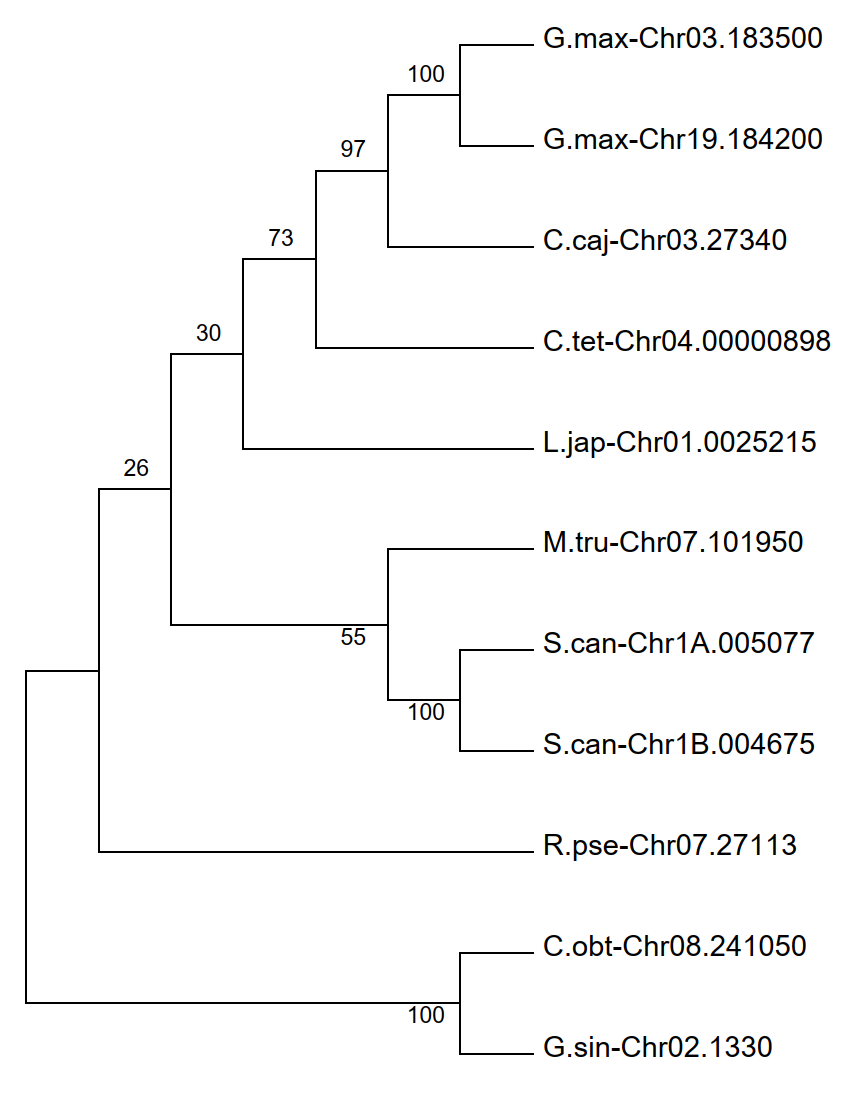


**ManS**

**Supplemental Figure 3. Phylogenetic tree of *ManS*.** We extracted homologous protein sequences of the target gene from various species and constructed an unrooted phylogenetic tree using the Neighbor-Joining (NJ) method. During the construction process, we performed 1000 bootstrap replications to assess the reliability of the branches in the tree.


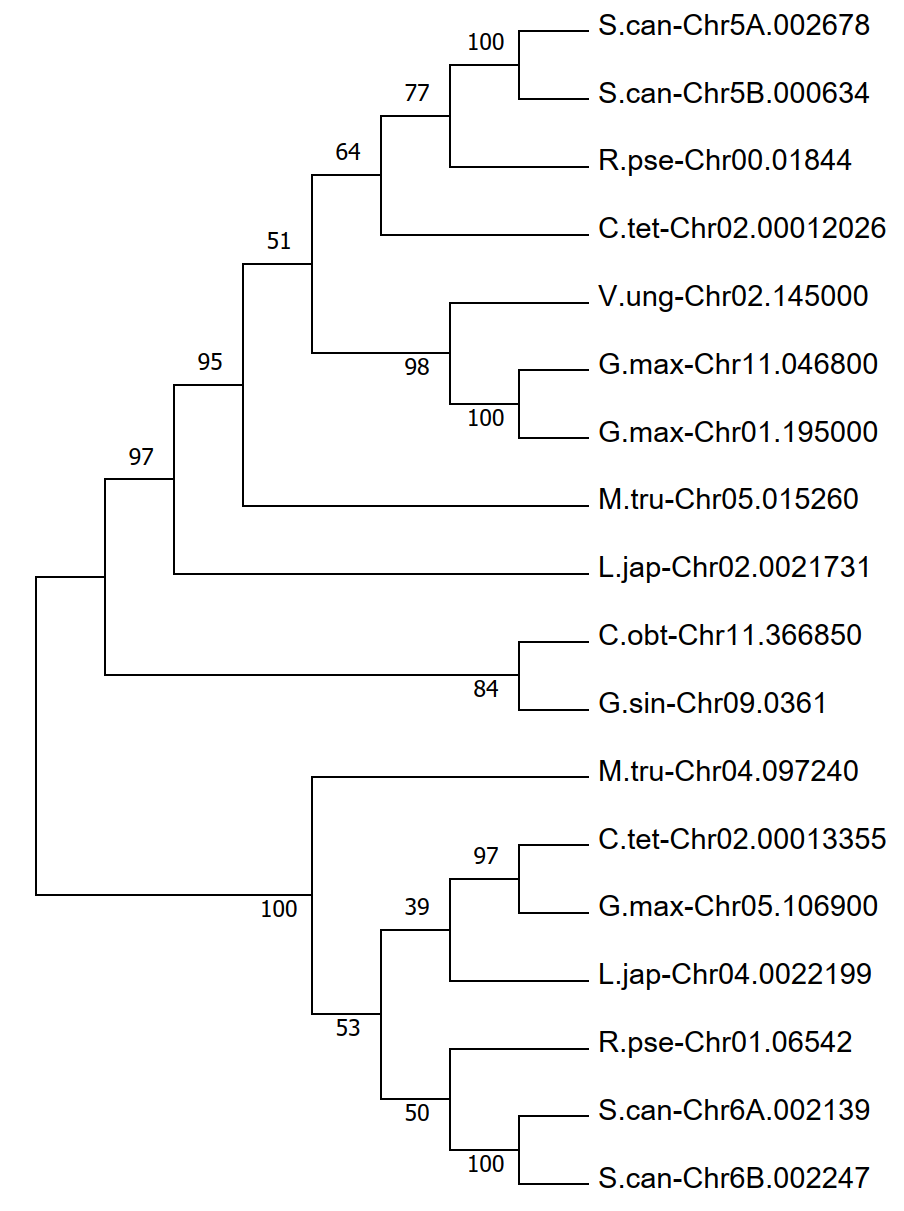


**GMGT1**

**Supplemental Figure 4. Phylogenetic tree of *GMGT1*.** We extracted homologous protein sequences of the target gene from various species and constructed an unrooted phylogenetic tree using the Neighbor-Joining (NJ) method. During the construction process, we performed 1000 bootstrap replications to assess the reliability of the branches in the tree.


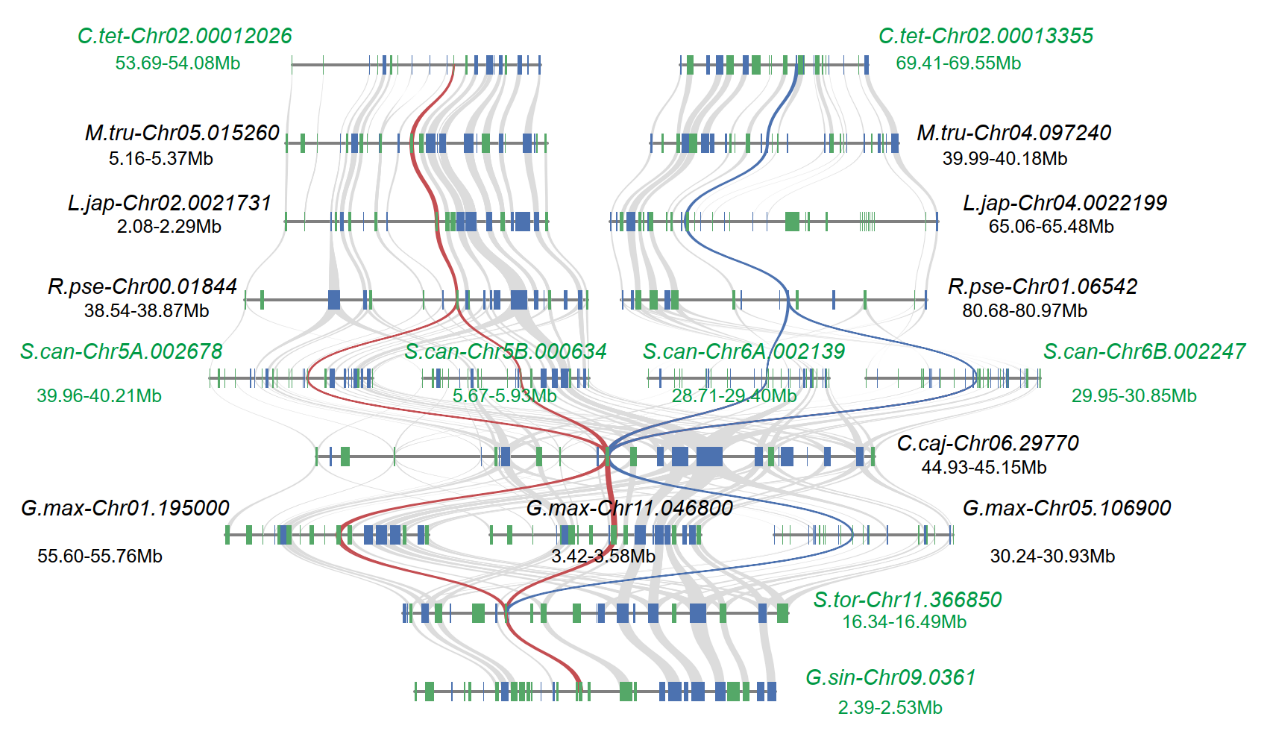


**Supplemental Figure 5. Microsynteny analysis of the *GMGT1* gene using JCVI.** The figure presented illustrates the homology and genomic collinearity of the target gene across selected species. Each horizontal bar represents a chromosome from a species, with colored blocks indicating the position and direction of the gene. In our species of interest, the target gene is present in two copies, which are depicted in distinct colors to differentiate them. The connecting lines signify the homologous relationships between genes. The chromosome numbers and genomic coordinates provided in the figure offer accurate localization information for the genes.
