# Supplementary material
Source: Research Square preprint supplement (doi:10.21203/rs.3.rs-9132094/v1)
Supplement: Supplementary file 3 [file f035bdbd029ea911c3789747.xlsx]

## Sheet:  Table S1
Supplemental Table 1: Flow cytometry analyses of C. tetragonoloba
Sample ID	Internal Species	Fluorescence stronger (Internal control)	Fluorescence stronger (Sample)	Genome size (G)	Genome size average	Stdev
C.tetragonoloba	S. lycopersicum	45.54	25.39	0.49	0.51	0.02
	S. lycopersicum	45.55	25.41	0.49
	S. lycopersicum	44.78	25.46	0.57
	Z.mays	113.41	25.14	0.51
	Z.mays	109.36	24.93	0.52
	Z.mays	109.04	24.83	0.52

## Sheet: Table S2
Supplemental Table 2: Genome size estimation of C. tetragonoloba based on different k-mers.
K-mer length	Effective kmer individuals	Coverage depth	Effective kmer species	Estimated genome size	Estimated genome size （average）
19	74093145224	137.805	295811225	537668000	5.391e+08
21	72627945452	134.821	316961148	538700000
23	71263670898	131.742	329475049	540933000

## Sheet:  Table S3
Supplemental Table 3: Summary of sequencing strategy and data producing for C. tetragonoloba genome and transcriptome.
Dataset	Tissue used	Sequencing plateform	Libarary type	Insert size (bp)	Average read length (bp)	Number of reads		Data size
						Raw	Clean	Raw (Gb)	Clean (Gb)	Sequencing depth (×)
Illumina	leaf	Illumina Hiseq	Paired-end	500	300	289546925	288902808	86.86	86.67	168.9 ×
PacBio	leaf	Pacbio Sequel	Single	-	21544	-	7074565	152.45	152.41	295.4 ×
Hi-C	leaf	Illumina Hiseq	Paired-end	500	300	399736747	398084775	119.92	119.42	231.43 ×
RNA-Seq	Flower-1	Illumina Hiseq	Paired-end	500	150	50762710	48911044	-	7.34	-
RNA-Seq	Flower-2	Illumina Hiseq	Paired-end	500	150	50402940	48945516	-	7.34	-
RNA-Seq	Flower-3	Illumina Hiseq	Paired-end	500	150	44740742	43281950	-	6.49	-
RNA-Seq	Fruit-1	Illumina Hiseq	Paired-end	500	150	42771728	41506818	-	6.23	-
RNA-Seq	Fruit-2	Illumina Hiseq	Paired-end	500	150	51675414	49916816	-	7.49	-
RNA-Seq	Fruit-3	Illumina Hiseq	Paired-end	500	150	46522010	44816962	-	6.72	-
RNA-Seq	Leaf-1	Illumina Hiseq	Paired-end	500	150	51048994	49456446	-	7.42	-
RNA-Seq	Leaf-2	Illumina Hiseq	Paired-end	500	150	50032864	48426154	-	7.26	-
RNA-Seq	Leaf-3	Illumina Hiseq	Paired-end	500	150	44688570	43466088	-	6.52	-
RNA-Seq	Root-1	Illumina Hiseq	Paired-end	500	150	47217338	45890340	-	6.88	-
RNA-Seq	Root-2	Illumina Hiseq	Paired-end	500	150	52577564	51068954	-	7.66	-
RNA-Seq	Root-3	Illumina Hiseq	Paired-end	500	150	50446476	48793812	-	7.32	-
RNA-Seq	Seed-1	Illumina Hiseq	Paired-end	500	150	60497342	58836476	-	8.83	-
RNA-Seq	Seed-2	Illumina Hiseq	Paired-end	500	150	62423360	60556986	-	9.08	-
RNA-Seq	Seed-3	Illumina Hiseq	Paired-end	500	150	57391686	55456882	-	8.32	-

## Sheet:  Table S4
Supplemental Table 4: Summary of genome assembly and annotation statistics for Cyamopsis tetragonoloba
Category	Metric	Value
Assembly	Estimated genome size	510Mb
	Assembled size	516Mb
	Number of chromosomes	7
	Contig N50	3.98Mb
	GC content	0.3281
	Repetitive sequences	0.5396
Gene Annotation	Predicted gene models	47440
	Complete BUSCOs	0.941
	Fragmented BUSCOs	0.019
	Missing BUSCOs	0.04
Repetitive Elements	LTR retrotransposons	0.2388
	LTR Assembly Index(LAI)	12.98

## Sheet: Table S5
Supplemental Table 5. The chromosome lengths of the genome of C. tetragonoloba.
Chromosome Number	Size(Bp)
1	120354083
2	96412562
3	95763603
4	60993465
5	58312157
6	42671226
7	42008486

## Sheet:  Table S6
Supplemental Table 6. Comparison rate of C. tetragonoloba.
ID	percent(%)
Hi-C	99.53
Illumina	99.7
RNA-seq_GB_FL1	97.91
RNA-seq_GB_FL2	98.23
RNA-seq_GB_FL3	97.97
RNA-seq_GB_FR1	97.94
RNA-seq_GB_FR2	97.91
RNA-seq_GB_FR3	97.8
RNA-seq_GB_L1	98.21
RNA-seq_GB_L2	98.11
RNA-seq_GB_L3	98.28
RNA-seq_GB_R1	97.85
RNA-seq_GB_R2	97.6
RNA-seq_GB_R3	97.25
RNA-seq_GB_S1	98.35
RNA-seq_GB_S2	98.33
RNA-seq_GB_S3	97.93
Average-RNA-seq	97.98
